# Supplementary material for: UDP-glucose pyrophosphorylase 2, a regulator of glycogen synthesis and glycosylation, is critical for pancreatic cancer growth
Source: PubMed Central journal article supplement — Proc Natl Acad Sci U S A. 2021 Jul 30;118(31):e2103592118. doi: 10.1073/pnas.2103592118 (PMC8346792; doi:10.1073/pnas.2103592118), 2021-07-30
Supplement: pnas.2103592118.sapp.pdf [file pnas.2103592118.sapp.pdf]

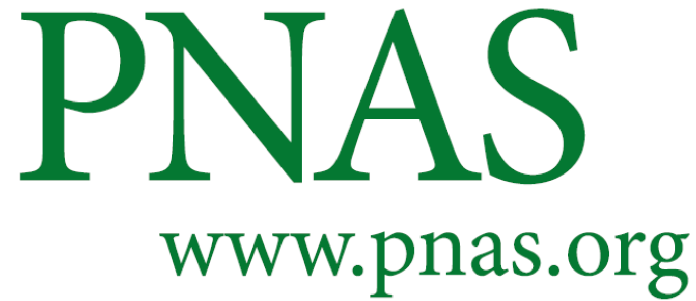

### **Supplementary Information Appendix**

UDP-glucose pyrophosphorylase 2, a regulator of glycogen synthesis and glycosylation, is critical for pancreatic cancer growth

Andrew L. Wolfe, Qingwen Zhou, Eneda Toska, Jacqueline Galeas, Angel A. Ku, Richard P. Koche, Sourav Bandyopadhyay, Maurizio Scaltriti, Carlito B. Lebrilla, Frank McCormick<sup>1</sup>, and Sung Eun Kim<sup>1</sup>

<sup>1</sup>Co-corresponding Authors:

Frank McCormick [frank.mccormick@ucsf.edu](mailto:frank.mccormick@ucsf.edu)

Sung Eun Kim [sek19@korea.ac.kr](mailto:sek19@korea.ac.kr)

This file includes Supplementary Figures S1-S5, Table S1, and legends.

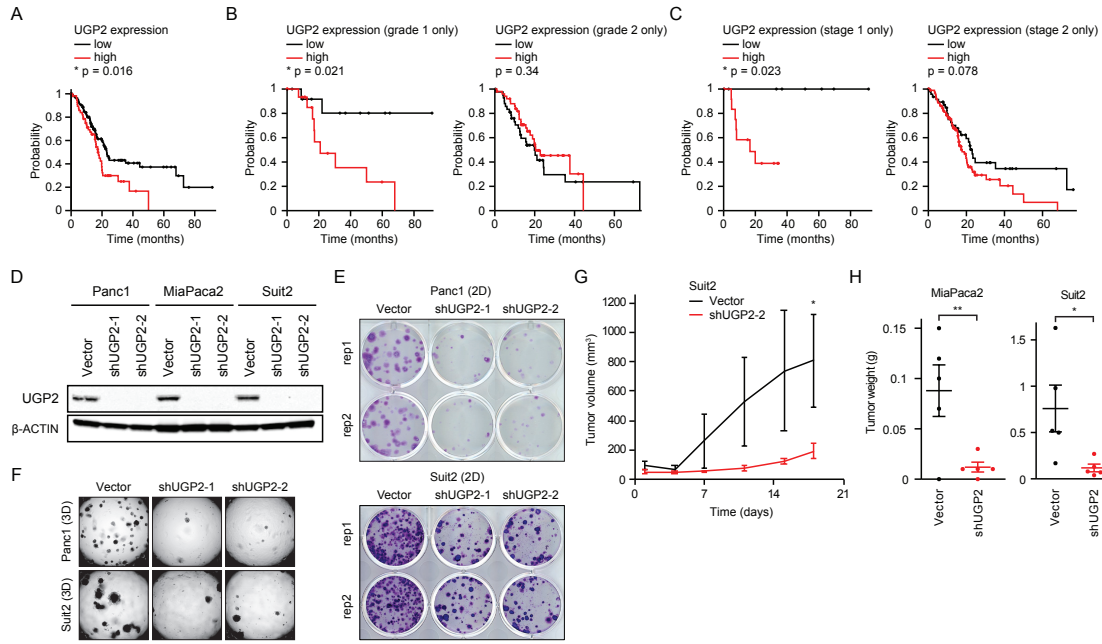

**Figure S1. A-C**, Cumulative probability of survival of 177 patients with pancreatic ductal adenocarcinoma based on expression level of UGP2 for all patients (A), grade 1 (B, left), grade 2 (B, right), stage 1 (C, left), and stage 2 (C, right). Data adapted from cBioPortal and KM Plotter (12). **D**, Immunoblots for shRNAs knocking down UGP2 in Panc1, MiaPaca2, and Suit2 cells, probed as indicated. **E**, Representative crystal violet staining of Panc1 and Suit2 cells with two independent shRNAs against UGP2 or empty vector control grown in two-dimensional culture for 10 days. **F**, Representative images of Panc1 and Suit2 cells stably expressing shUGP2 or empty vector control grown in three-dimensional matrigel for 14 days. **G**, Tumor volumes of Suit2 cells with a second shRNA against UGP2 or empty vector control xenografted on opposite flanks of nude mice,  $n = 5$ ,  $* p < 0.05$ . Error bars represent SEM. **H**, Tumor weights at endpoint of MiaPaca2 and Suit2 cells with shUGP2 or empty vector control xenografted on opposite flanks of nude mice,  $n = 4$ ,  $* p < 0.05$ ,  $** p < 0.01$ .

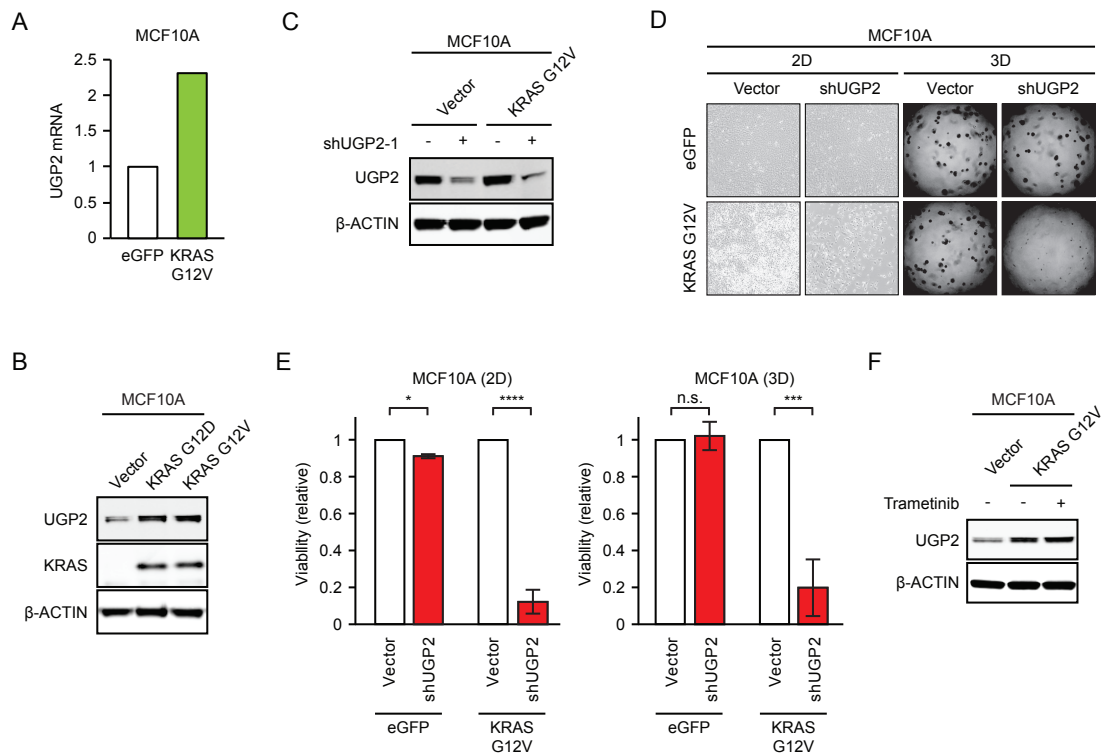

**Figure S2. A**, mRNA expression of UGP2 from RNAseq on MCF10A cells stably expressing KRAS G12V or empty vector. **B**, Immunoblot of lysates from MCF10A cells stably expressing KRAS G12D, KRAS G12V, or empty vector. **C**, Immunoblot of lysates from MCF10A cells expressing KRAS G12V or empty vector with or without knockdown of UGP2. **D-E**, Representative images (D) and relative viability (E) of MCF10A cells expressing KRAS G12V or empty vector with or without UGP2 knockdown grown in 2D or 3D matrigel for 14 days,  $n = 3$ . Error bars represent SEM,  $n = 3$ . \*  $p < 0.05$ , \*\*\*  $p < 0.001$ , \*\*\*\*  $p < 0.0001$ . **F**, Immunoblot of lysates from MCF10A cells stably expressing KRAS G12V or empty vector treated with 100 nM trametinib for 48 hours, probed as indicated.

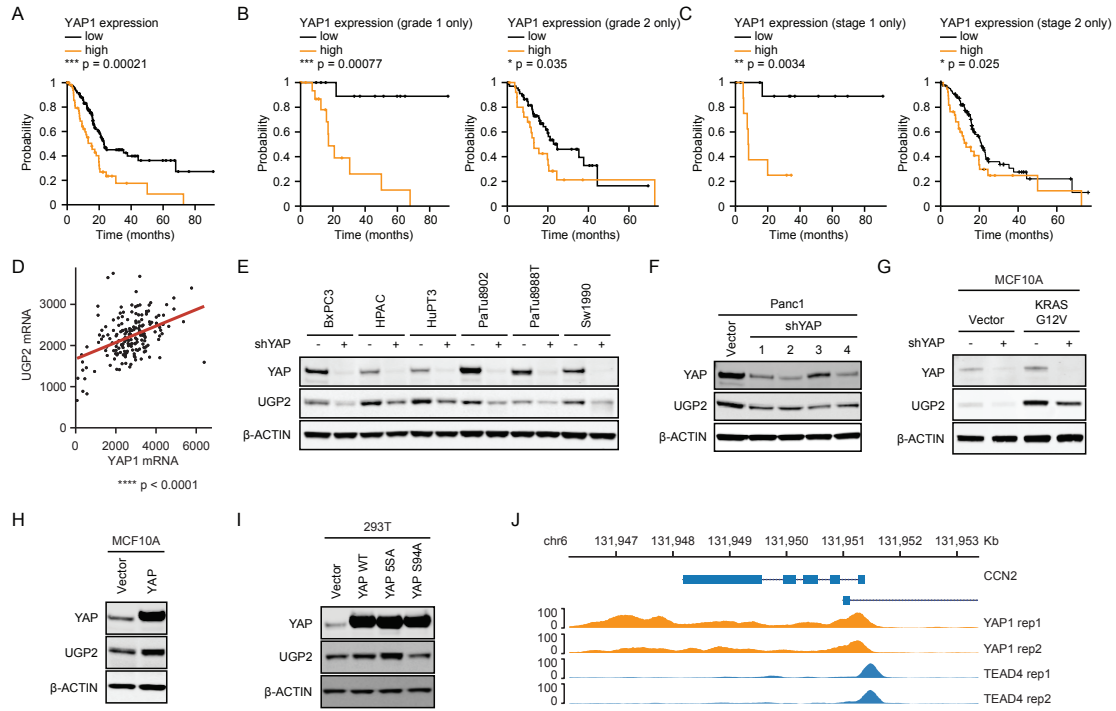

**Figure S3. A-C**, Cumulative probability of survival of 177 patients with pancreatic ductal adenocarcinoma based on expression level of YAP1 for all patients (A), grade 1 (B, left), grade 2 (B, right), stage 1 (C, left), and stage 2 (C, right). Data adapted from cBioPortal and KM Plotter (12). **D**, Correlation between UGP2 and YAP1 mRNA level in PDAC patient samples. Analysis performed using cBioPortal,  $n = 178$ ,  $R^2 = 0.18$ , Pearson = 0.43,  $p = 3 \times 10^{-9}$ . **E**, Immunoblots on a panel of PDAC cell lines cells with shRNAs against YAP or vector control, probed as indicated. **F**, Immunoblots of Panc1 with four different YAP shRNAs, probed as indicated. **G**, Immunoblots of MCF10A stably expressing KRAS G12V or control vector with knockdown of YAP, probed as indicated. **H-I**, Immunoblots on lysates from MCF10A (H) and 293T (I) cells stably expressing wild-type YAP, YAP 5SA, YAP S94A, or empty vector, probed as indicated. **J**, ChIP-seq for the control YAP1/TEAD4 binding site in the CCN2 genomic region.

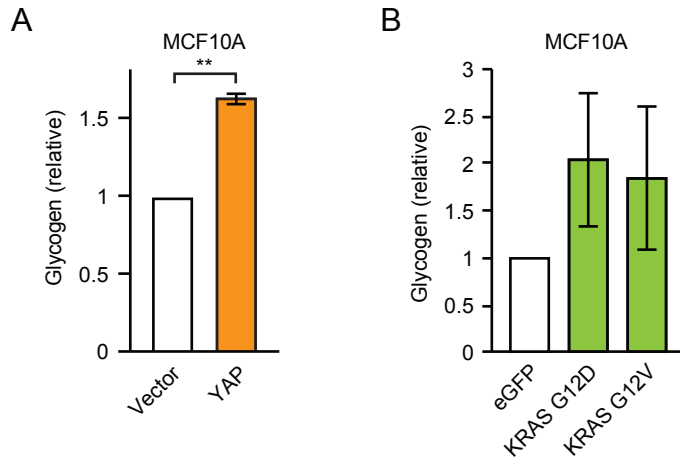

**Figure S4. A**, Relative glycogen levels in MCF10A cells expressing YAP or empty vector control, \*\*  $p < 0.01$ . **B**, Relative glycogen levels in MCF10A cells expressing KRAS G12D or G12V or empty vector control.

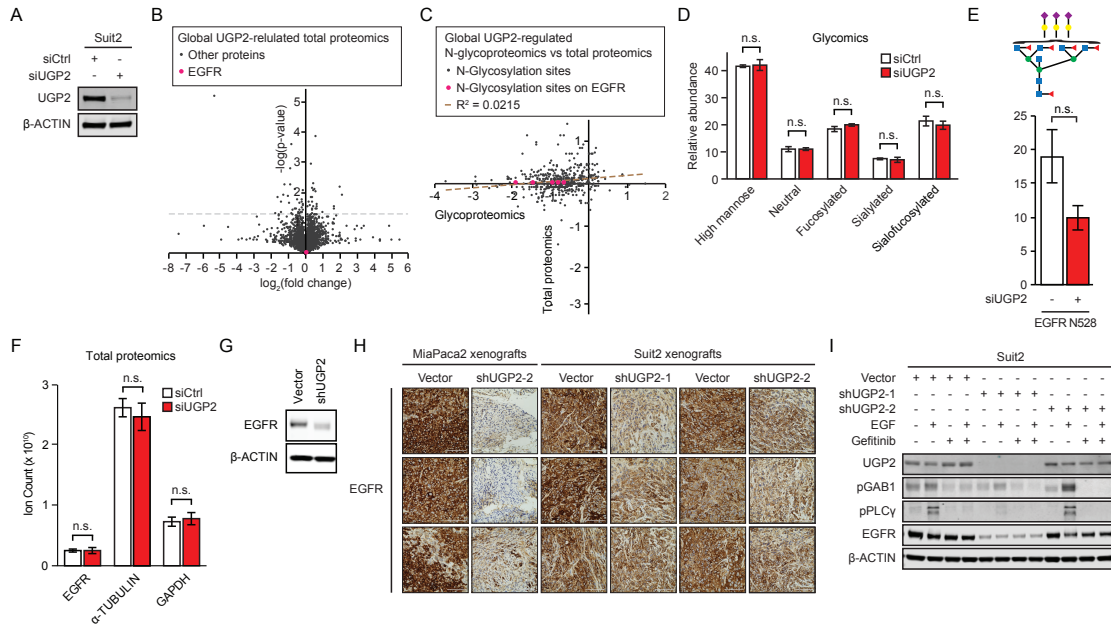

**Figure S5.** **A**, Immunoblots on lysates of Suit2 cells transfected with siUGP2 or non-targeting control siRNAs for 48 hours, probed as indicated. **B**, Global total proteomic analysis in Suit2 cells upon knockdown of UGP2 relative to non-targeting control siRNAs after 48 hours, red dots represent total EGFR. **C**, Shown are  $\log_2$  of the fold change in specific modifications plotted against  $\log_2$  of the fold change in total protein upon knockdown of UGP2 in Suit2 cells.  $R^2 = 0.0215$ , red dots represent EGFR modifications. **D**, Global glycomic comparison in Suit2 cells with siUGP2 of non-targeting control siRNAs at 48 hours, n.s. not significant at a threshold of  $p < 0.05$ . **E**, Quantification of glycan modifications on EGFR N528 in Suit2 cells with siUGP2 or non-targeting control siRNAs at 48 hours. n.s. not significant at a threshold of  $p < 0.05$ , blue squares represent N-acetylglucosamines, green circles represent mannoses, yellow circles represent galactoses, red triangles represent fucoses, and purple diamonds represent N-acetylneuraminic acid. **F**, Quantification of total EGFR,  $\alpha$ -TUBULIN, and GAPDH proteins by mass spectrometry in Suit2 cells upon knockdown of UGP2 or non-targeting control siRNAs. n.s. not significant at a threshold of  $p < 0.05$ . **G**, Immunoblot of lysates from Panc1 cells stably expressing shUGP2 or empty vector, probed as indicated. **H**, Representative immunohistochemical staining of EGFR in three opposite-flank pairs of MiaPaca2 and Suit2 tumors with shUGP2-1, shUGP2-2, or vector control at endpoint. Scale bars represent 100  $\mu\text{m}$ . **I**, Immunoblot of Suit2 cells stably expressing shUGP2-1, shUGP2-2, or empty vector, pretreated with 10  $\mu\text{M}$  gefitinib for 1 hour and/or stimulated with 100 ng/mL EGF for 10 minutes, probed as indicated.

**Table S1.** N-glycoproteomics and total proteomics. A-B, Changes in N-glycan modifications (A) and total protein (B) in Suit2 cells treated with siUGP2 or siCtrl pools for 48 hours, n = 3.
